# Supplementary material for: Implementation of pre-exposure prophylaxis programme in Spain. Feasibility of four different delivery models
Source: PubMed Central journal article supplement (PMC7870089; doi:10.1371/journal.pone.0246129), 2021-02-08
Supplement: pone.0246129.s001.pdf [file pone.0246129.s001.pdf]

## S1 Appendix. Study questionnaires

### Behavioural variables

|                                                                                 |
|---------------------------------------------------------------------------------|
| <b>Variable: Condom use during sexual intercourse (Spanish):</b>                |
| <i>¿Con qué frecuencia usa el preservativo durante sus relaciones sexuales?</i> |
| Nunca                                                                           |
| Ocasionalmente                                                                  |
| Habitualmente                                                                   |
| Siempre                                                                         |

|                                                                  |
|------------------------------------------------------------------|
| <b>Variable: Condom use during sexual intercourse (English):</b> |
| <i>How often do you use condom during sexual intercourse?</i>    |
| Never                                                            |
| Sometimes                                                        |
| Often                                                            |
| Always                                                           |

|                                                                      |
|----------------------------------------------------------------------|
| <b>Variable: Regular use of drugs (Spanish):</b>                     |
| <i>¿Cuáles de las siguientes drogas utilizas de manera habitual?</i> |
| Alcohol                                                              |
| Cannabis                                                             |
| GHB/GBL                                                              |
| Poppers                                                              |
| MDMA                                                                 |
| Ketamina                                                             |
| Mefedrona                                                            |
| Speed                                                                |
| Metanfetamina                                                        |
| Otras drogas                                                         |

|                                                      |
|------------------------------------------------------|
| <b>Variable: Regular use of drugs (English):</b>     |
| <i>Which of the following do you take regularly?</i> |
| Alcohol                                              |
| Cannabis                                             |
| GHB/GBL                                              |
| Poppers                                              |
| MDMA                                                 |
| Ketamine                                             |
| Mephedrone                                           |
| Speed                                                |
| Metamphetamine                                       |
| Other drugs                                          |

### PrEP related measures

|                                                                        |
|------------------------------------------------------------------------|
| <b>Variable: Number of missed doses (Spanish)</b>                      |
| <i>En la última semana, ¿cuántas veces has olvidado tomar la PrEP?</i> |
| Ninguna                                                                |
| 1-2                                                                    |
| 3-4                                                                    |
| 5-7                                                                    |

|                                                     |
|-----------------------------------------------------|
| <b>Variable: Number of missed doses (English)</b>   |
| <i>How many PrEP did you miss in the last week?</i> |
| None                                                |
| 1-2                                                 |
| 3-4                                                 |
| 5-7                                                 |

### Participant satisfaction

|                                                            |
|------------------------------------------------------------|
| <b>Variable: Satisfaction with waiting times (Spanish)</b> |
| <i>¿El tiempo de espera ha sido adecuado?</i>              |
| Completamente en desacuerdo                                |
| En desacuerdo                                              |
| De acuerdo                                                 |
| Completamente de acuerdo                                   |

|                                                            |
|------------------------------------------------------------|
| <b>Variable: Satisfaction with waiting times (English)</b> |
| <i>Was waiting time appropriate?</i>                       |
| Strongly disagree                                          |
| Disagree                                                   |
| Agree                                                      |
| Strongly agree                                             |

|                                                                                                   |
|---------------------------------------------------------------------------------------------------|
| <b>Variable: Satisfaction with the information received about collecting PrEP pills (Spanish)</b> |
| <i>¿La información recibida sobre cómo recoger la PrEP ha sido adecuada?</i>                      |
| Completamente en desacuerdo                                                                       |
| En desacuerdo                                                                                     |
| De acuerdo                                                                                        |
| Completamente de acuerdo                                                                          |

|                                                                                                   |
|---------------------------------------------------------------------------------------------------|
| <b>Variable: Satisfaction with the information received about collecting PrEP pills (English)</b> |
| <i>Was the information received about collecting PrEP pills appropriate?</i>                      |
| Strongly disagree                                                                                 |
| Disagree                                                                                          |
| Agree                                                                                             |
| Strongly agree                                                                                    |

|                                                                                                                    |
|--------------------------------------------------------------------------------------------------------------------|
| <b>Variable: Satisfaction with the information received about what to do in the case of side effects (Spanish)</b> |
| <i>¿La información recibida sobre cómo actuar en casa de efectos adversos ha sido adecuada?</i>                    |
| Completamente en desacuerdo                                                                                        |
| En desacuerdo                                                                                                      |
| De acuerdo                                                                                                         |
| Completamente de acuerdo                                                                                           |

|                                                                                                                    |
|--------------------------------------------------------------------------------------------------------------------|
| <b>Variable: Satisfaction with the information received about what to do in the case of side effects (English)</b> |
| <i>Was the information received about what to do in the case of side effects appropriate?</i>                      |
| Strongly disagree                                                                                                  |

|                |
|----------------|
| Disagree       |
| Agree          |
| Strongly agree |

|                                                                                                    |
|----------------------------------------------------------------------------------------------------|
| <b>Variable: General satisfaction with PrEP (Spanish)</b>                                          |
| <i>De manera general ¿qué grado de satisfacción tienes con respecto a la PrEP en este estudio?</i> |
| Muy satisfecho                                                                                     |
| Satisfecho                                                                                         |
| Neutral                                                                                            |
| Insatisfecho                                                                                       |

|                                                                               |
|-------------------------------------------------------------------------------|
| <b>Variable: General satisfaction with PrEP (English)</b>                     |
| <i>How would you rate your experience with PrEP in general in this study?</i> |
| Very satisfied                                                                |
| Satisfied                                                                     |
| Neutral                                                                       |
| Dissatisfied                                                                  |

### Practitioner satisfaction

|                                                                                                 |                          |            |               |                          |
|-------------------------------------------------------------------------------------------------|--------------------------|------------|---------------|--------------------------|
| <b>Variable: Practitioner satisfaction (Spanish)</b>                                            |                          |            |               |                          |
| <i>Por favor, indica tu nivel de acuerdo con cada uno de los siguientes enunciados</i>          |                          |            |               |                          |
| La aceptación de los participantes a participar en el estudio ha sido la esperada               | Completamente de acuerdo | De acuerdo | En desacuerdo | Completamente de acuerdo |
| La proporción de participantes que cumplió criterios de PrEP fue la esperada                    | Completamente de acuerdo | De acuerdo | En desacuerdo | Completamente de acuerdo |
| Las instalaciones del centro permitieron mantener la privacidad durante las visitas del estudio | Completamente de acuerdo | De acuerdo | En desacuerdo | Completamente de acuerdo |
| La relación con el hospital ha sido adecuada                                                    | Completamente de acuerdo | De acuerdo | En desacuerdo | Completamente de acuerdo |
| El centro ha contado con personal suficiente necesario para llevar a cabo el estudio            | Completamente de acuerdo | De acuerdo | En desacuerdo | Completamente de acuerdo |

|                                                                               |                |       |          |                   |
|-------------------------------------------------------------------------------|----------------|-------|----------|-------------------|
| <b>Variable: Practitioner satisfaction (English)</b>                          |                |       |          |                   |
| <i>Please, assess your degree of agreement with the following statements:</i> |                |       |          |                   |
| Participants' willingness to participate in the study was as high as expected | Strongly agree | Agree | Disagree | Strongly disagree |
| The proportion of participants meeting                                        | Strongly agree | Agree | Disagree | Strongly disagree |

|                                                                        |                |       |          |                   |
|------------------------------------------------------------------------|----------------|-------|----------|-------------------|
| PrEP criteria was similar to that expected                             |                |       |          |                   |
| The centre's facilities allowed privacy to be maintained during visits | Strongly agree | Agree | Disagree | Strongly disagree |
| The relationship with the hospital has been appropriate                | Strongly agree | Agree | Disagree | Strongly disagree |
| The centre has enough personnel to conduct the study                   | Strongly agree | Agree | Disagree | Strongly disagree |
