# Supplementary material for: Implementation of pre-exposure prophylaxis programme in Spain. Feasibility of four different delivery models
Source: PubMed Central journal article supplement (PMC7870089; doi:10.1371/journal.pone.0246129), 2021-02-08

**S1 Figure. Study flow chart**

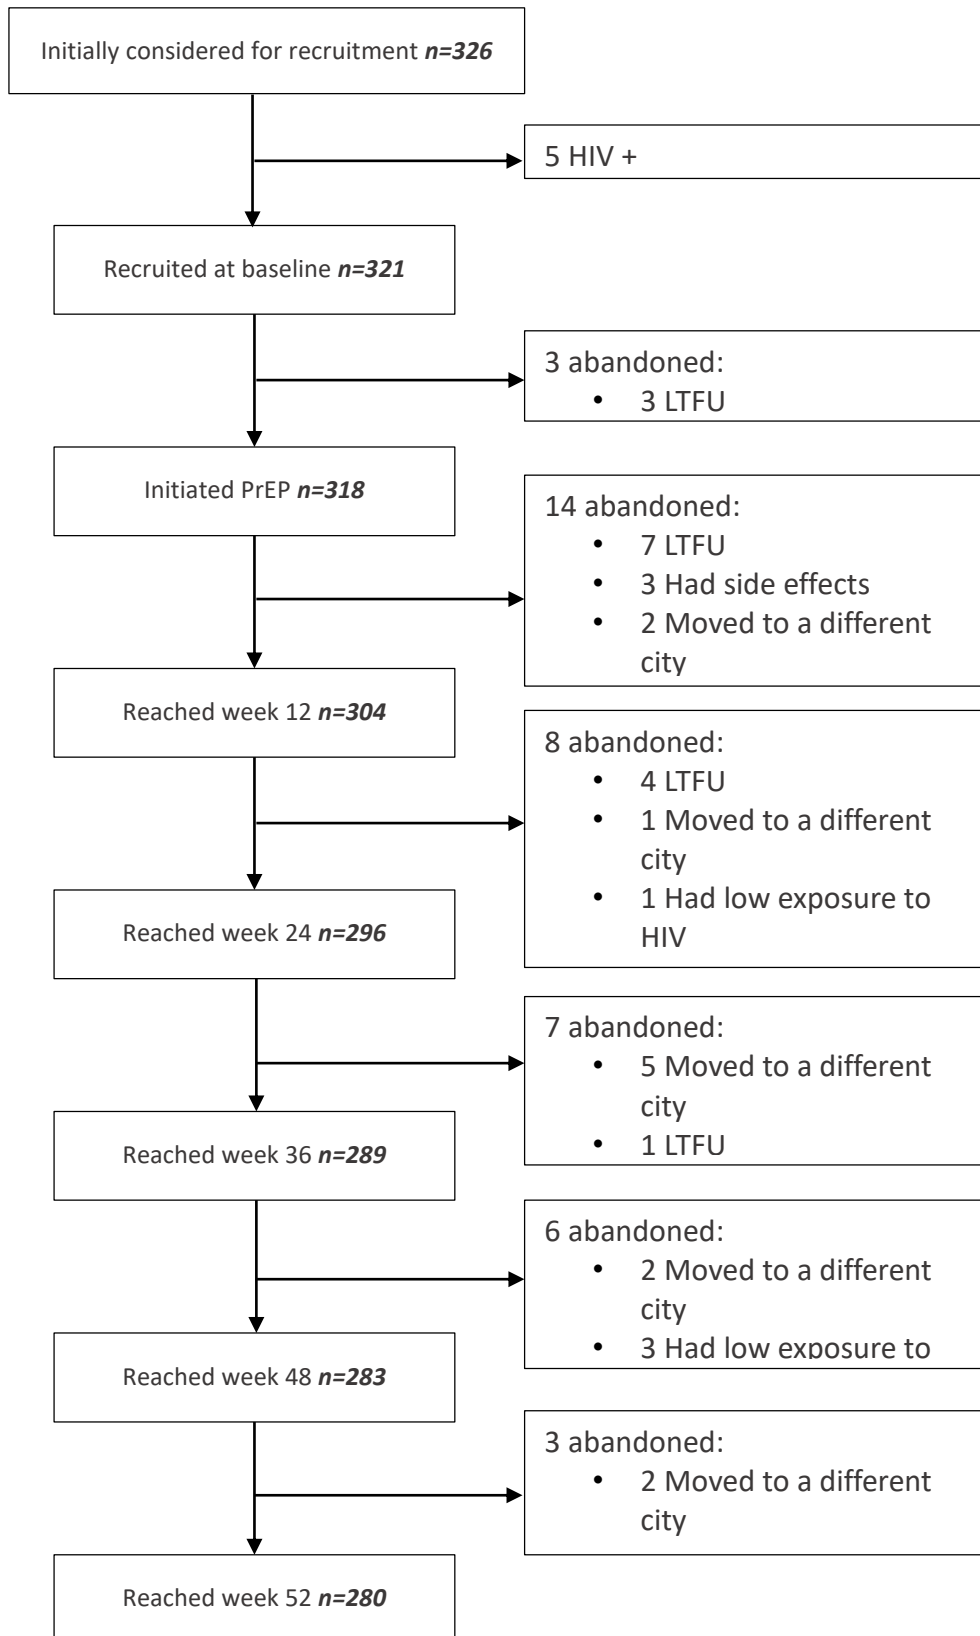

Supplement: pone.0246129.s002.pdf [file pone.0246129.s002.pdf]
